# Supplementary material for: Copper Oxide Nanoparticles Impact Several Toxicological Endpoints and Cause Neurodegeneration in Caenorhabditis elegans
Source: PubMed Central journal article supplement (PMC5135131; doi:10.1371/journal.pone.0167613), 2016-12-02
Supplement: pone.0167613.s002.pdf [file pone.0167613.s002.pdf]

Supplemental Information

**Copper oxide nanoparticles impact several toxicological endpoints and cause neurodegeneration in *Caenorhabditis elegans***

Michael J. Mashock<sup>1</sup>, Tyler Zanon<sup>1</sup>, Anthony D. Kappell<sup>1</sup>, Lisa N. Petrella<sup>1</sup>, Erik C. Andersen<sup>2</sup>, and Krassimira R. Hristova<sup>1\*</sup>

<sup>1</sup>Department of Biological Sciences, Marquette University, Milwaukee, Wisconsin, United States of America

<sup>2</sup>Department of Molecular Biosciences, Northwestern University, Evanston, Illinois, United States of America

\* Corresponding author

Email: [krassimira.hristova@marquette.edu](mailto:krassimira.hristova@marquette.edu)

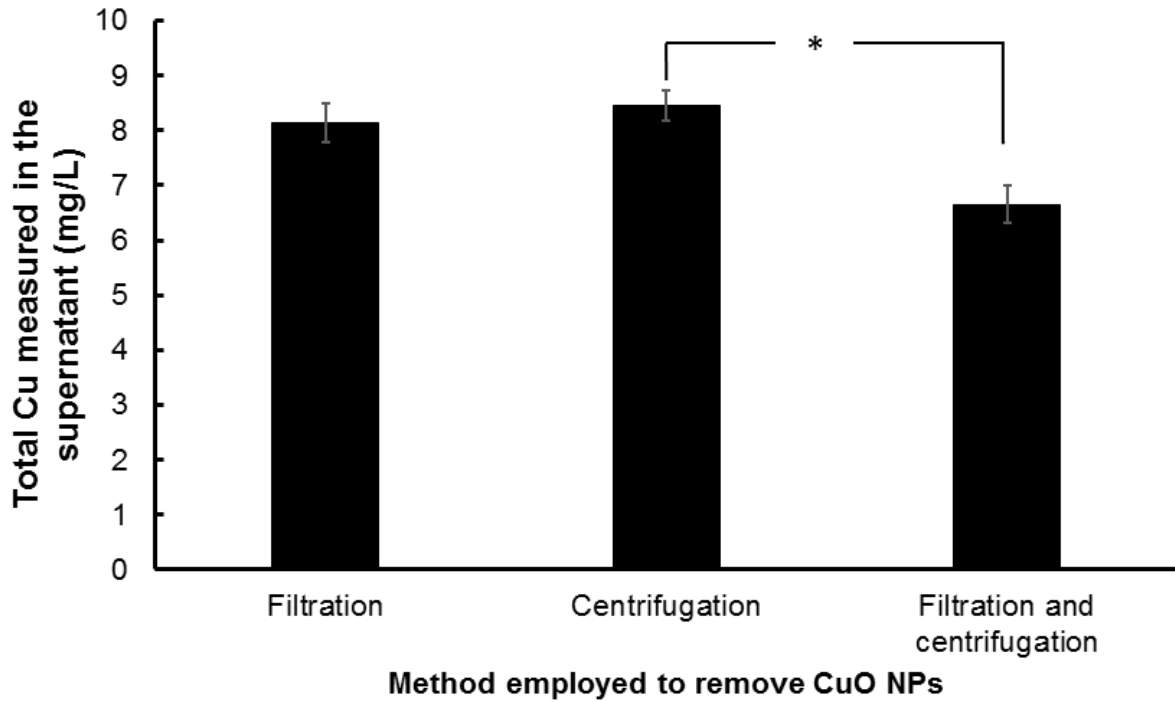

**Figure A: Filtration could remove Cu ions from supernatant.** The total amount of Cu ions released over time was determined via ICP-MS after 24-hour incubation of CuO NPs (9 mg Cu/L) in K-media. Statistical analysis (two-way ANOVA) indicates a significant difference between supernatant that underwent both filtration as well as centrifugation and supernatant that only underwent centrifugation, as represented by an asterisk (\*). Error bars represent standard error.

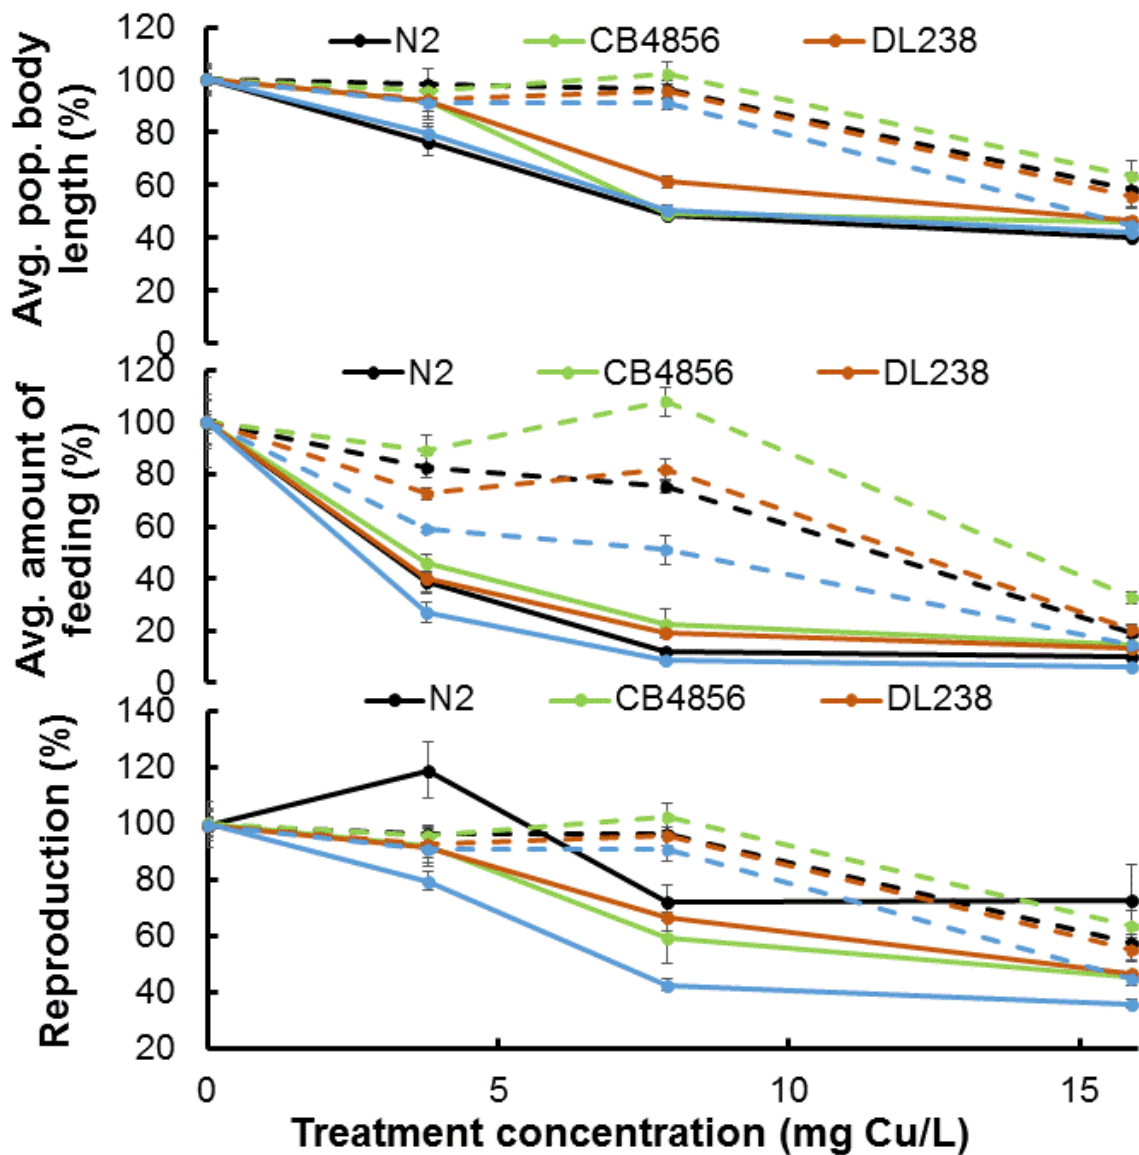

**Figure B: Comparison of copper exposures, copper sulfate and copper oxide, on N2 and three wild *Caenorhabditis elegans* strains.** The effects on body size (A), feeding behavior (B), and brood size (C) were examined. Data from endpoint changes are represented by dashed lines for copper sulfate exposure and solid lines for copper oxide NPs exposure. Results are presented as mean of four technical replicates and error bars represent standard error.

| Strain | mg Cu/L | Toxicological Endpoint Measurement |        |                  |        |                     |        |
|--------|---------|------------------------------------|--------|------------------|--------|---------------------|--------|
|        |         | Reproduction                       |        | Feeding Behavior |        | Average Body Length |        |
|        |         | NP                                 | Cu     | NP               | Cu     | NP                  | Cu     |
| N2     | 3.8     | 1.000                              | 1.000  | <0.001           | 1.000  | 0.247               | 1.000  |
|        | 7.9     | 0.365                              | 1.000  | <0.001           | 0.997  | <0.001              | 1.000  |
|        | 15.9    | 0.190                              | <0.001 | <0.001           | <0.001 | <0.001              | <0.001 |
| CB4856 | 3.8     | 1.000                              | 1.000  | <0.001           | 1.000  | 1.000               | 1.000  |
|        | 7.9     | <0.001                             | 1.000  | <0.001           | 1.000  | <0.001              | 1.000  |
|        | 15.9    | <0.001                             | 0.015  | <0.001           | <0.001 | <0.001              | <0.001 |
| DL238  | 3.8     | 1.000                              | 1.000  | <0.001           | 0.998  | 1.000               | 1.000  |
|        | 7.9     | 0.075                              | 1.000  | <0.001           | 1.000  | <0.001              | 1.000  |
|        | 15.9    | <0.001                             | <0.001 | <0.001           | <0.001 | <0.001              | <0.001 |
| JU258  | 3.8     | 0.970                              | 1.000  | <0.001           | 0.127  | 0.669               | 1.000  |
|        | 7.9     | <0.001                             | 1.000  | <0.001           | 0.004  | <0.001              | 1.000  |
|        | 15.9    | <0.001                             | <0.001 | <0.001           | <0.001 | <0.001              | <0.001 |

**Table A. Statistical difference between untreated and copper exposed nematodes.**

Statistical comparison, Tukey's honest significant difference (HSD) p-values, of 24-hour copper exposed *Caenorhabditis elegans* and untreated nematode population body length, feeding behavior, and reproduction. The p-values were determined by Tukey's HSD using R;  $p < 0.05$  was considered significant.

| Strain | mg Cu/L | Toxicological Endpoint Measurement |                  |                     |
|--------|---------|------------------------------------|------------------|---------------------|
|        |         | Reproduction                       | Feeding Behavior | Average Body Length |
| N2     | 3.8     | 0.993                              | <0.001           | 0.380               |
|        | 7.9     | 0.586                              | <0.001           | <0.001              |
|        | 15.9    | 0.995                              | 0.014            | 0.026               |
| CB4856 | 3.8     | 1.000                              | 0.004            | 1.000               |
|        | 7.9     | <0.001                             | <0.001           | <0.001              |
|        | 15.9    | 0.591                              | <0.001           | 0.107               |
| DL238  | 3.8     | 1.000                              | 0.155            | 1.000               |
|        | 7.9     | 0.202                              | <0.001           | 0.002               |
|        | 15.9    | 1.000                              | 0.980            | 0.997               |
| JU258  | 3.8     | 1.000                              | 0.080            | 0.999               |
|        | 7.9     | <0.001                             | <0.001           | <0.001              |
|        | 15.9    | 0.978                              | 0.035            | 0.720               |

**Table B. Statistical differences between copper oxide nanoparticle inhibitory effects and the inhibitory effect from copper sulfate exposure.**

Statistical comparison, Tukey's HSD p-values, of copper oxide nanoparticle and copper sulfate effects after 24-hour exposure on *Caenorhabditis elegans* average body length, feeding behavior, and reproduction. The p-values were determined by Tukey's HSD using R;  $p < 0.05$  was considered significant.

| Strain | Toxicological Endpoint Measurement | Treatment    |       |        |              |       |       |
|--------|------------------------------------|--------------|-------|--------|--------------|-------|-------|
|        |                                    | NP (mg Cu/L) |       |        | Cu (mg Cu/L) |       |       |
|        |                                    | 3.8          | 7.9   | 15.9   | 3.8          | 7.9   | 15.9  |
| CB4856 | Body Length                        | 0.967        | 1.000 | 1.000  | 1.000        | 1.000 | 1.000 |
|        | Feed Behav.                        | 1.000        | 0.543 | 0.981  | 1.000        | 0.850 | 0.124 |
|        | Reproduction                       | 0.955        | 0.985 | 0.094  | 1.000        | 1.000 | 1.000 |
| DL238  | Body Length                        | 0.936        | 0.873 | 0.998  | 1.000        | 1.000 | 1.000 |
|        | Feed Behav.                        | 1.000        | 0.080 | 0.561  | 1.000        | 1.000 | 1.000 |
|        | Reproduction                       | 0.889        | 1.000 | 0.281  | 1.000        | 1.000 | 1.000 |
| JU258  | Body Length                        | 1.000        | 1.000 | 1.000  | 1.000        | 1.000 | 0.513 |
|        | Feed Behav.                        | 1.000        | 1.000 | 1.000  | 0.915        | 0.634 | 0.996 |
|        | Reproduction                       | 0.125        | 0.013 | <0.001 | 1.000        | 1.000 | 0.954 |

**Table C. Statistical differences in response to copper exposure from the lab adapted N2 strain and the wild nematode strains.**

Statistical comparison, Tukey's HSD p-values, of the laboratory-adapted *Caenorhabditis elegans* N2 strain and the wild nematode strain average body length, feeding behavior, and reproduction after copper exposure. The laboratory-adapted N2 (Bristol) strain and three wild strains were exposed to copper oxide nanoparticles or soluble copper (CuSO<sub>4</sub>). The p-values were determined by Tukey's HSD using R;  $p < 0.05$  was considered significant.

| Strain | CB4855 | JU258  | DL238  |
|--------|--------|--------|--------|
| N2     | <0.001 | 0.038  | 0.046  |
| CB4856 |        | <0.001 | 0.334  |
| JU258  |        |        | <0.001 |

**Table D. Tukey's HSD statistical analysis results post 3-WAY ANOVA based on the main factor of strain for feeding behavior.**

Statistical comparison, Tukey's HSD p-values, of the laboratory-adapted *Caenorhabditis elegans* N2 strain and the wild nematode strain feeding behavior. The laboratory-adapted N2 (Bristol) strain and three wild strains were exposed to copper oxide nanoparticles or soluble copper (CuSO<sub>4</sub>). The p-values were determined by Tukey's HSD using R;  $p < 0.05$  was considered significant.

| Strain | Metal | N2     | CB4855 |        | DL238  |        | JU258  |        |
|--------|-------|--------|--------|--------|--------|--------|--------|--------|
|        |       | Cu     | NP     | Cu     | NP     | Cu     | NP     | Cu     |
| N2     | NP    | <0.001 | 0.075  | <0.001 | 0.009  | <0.001 | 0.996  | <0.001 |
|        | Cu    |        | <0.001 | 0.052  | <0.001 | 1.000  | <0.001 | 0.043  |
| CB4855 | NP    |        |        | <0.001 | 0.998  | <0.001 | 0.011  | <0.001 |
|        | Cu    |        |        |        | <0.001 | 0.534  | <0.001 | <0.001 |
| DL238  | NP    |        |        |        |        | <0.001 | <0.001 | 0.005  |
|        | Cu    |        |        |        |        |        | <0.001 | 0.042  |
| JU258  | NP    |        |        |        |        |        |        | <0.001 |

**Table E. Tukey's HSD statistical analysis results post 3-WAY ANOVA based on the interaction of strain and treatment (form of Cu) for feeding behavior.**

Statistical comparison, Tukey's HSD p-values, of the laboratory-adapted *Caenorhabditis elegans* N2 strain and the wild nematode strain feeding behavior. The laboratory-adapted N2 (Bristol) strain and three wild strains were exposed to copper oxide nanoparticles or soluble copper (CuSO<sub>4</sub>). The p-values were determined by Tukey's HSD using R;  $p < 0.05$  was considered significant.

| Strain | CB4855 | JU258 | DL238  |
|--------|--------|-------|--------|
| N2     | 0.380  | 0.105 | 0.143  |
| CB4856 |        | 0.001 | 0.947  |
| JU258  |        |       | <0.001 |

**Table F. Tukey's HSD statistical analysis results post 3-WAY ANOVA based on the main factor of strain for average body length.**

Statistical comparison, Tukey's HSD p-values, of the laboratory-adapted *Caenorhabditis elegans* N2 strain and the wild nematode strain for average body length. The laboratory-adapted N2 (Bristol) strain and three wild strains were exposed to copper oxide nanoparticles or soluble copper (CuSO<sub>4</sub>). The p-values were determined by Tukey's HSD using R;  $p < 0.05$  was considered significant.

| Strain | Metal | N2     | CB4855 |        | DL238 |        | JU258  |        |
|--------|-------|--------|--------|--------|-------|--------|--------|--------|
|        |       | Cu     | NP     | Cu     | NP    | Cu     | NP     | Cu     |
| N2     | NP    | <0.001 | 0.711  | <0.001 | 0.022 | <0.001 | 0.963  | <0.001 |
|        | Cu    |        | <0.001 | 0.999  | 0.021 | 1.000  | <0.001 | 0.374  |
| CB4855 | NP    |        |        | <0.001 | 0.691 | <0.001 | 0.135  | 0.056  |
|        | Cu    |        |        |        | 0.003 | 0.990  | <0.001 | 0.112  |
| DL238  | NP    |        |        |        |       | 0.039  | <0.001 | 0.892  |
|        | Cu    |        |        |        |       |        | <0.001 | 0.522  |
| JU258  | NP    |        |        |        |       |        |        | <0.001 |

**Table G. Tukey's HSD statistical analysis results post 3-WAY ANOVA based on the interaction of strain and treatment (form of Cu) for average body length.**

Statistical comparison, Tukey's HSD p-values, of the laboratory-adapted *Caenorhabditis elegans* N2 strain and the wild nematode strain for average body length. The laboratory-adapted N2 (Bristol) strain and three wild strains were exposed to copper oxide nanoparticles or soluble copper (CuSO<sub>4</sub>). The p-values were determined by Tukey's HSD using R;  $p < 0.05$  was considered significant.



| Strain | CB4855 | JU258  | DL238 |
|--------|--------|--------|-------|
| N2     | 0.072  | <0.001 | 0.151 |
| CB4856 |        | 0.009  | 0.987 |
| JU258  |        |        | 0.003 |

**Table H. Tukey's HSD statistical analysis results post 3-WAY ANOVA based on the main factor of strain for reproduction.**

Statistical comparison, Tukey's HSD p-values, of the laboratory-adapted *Caenorhabditis elegans* N2 strain and the wild nematode strain for reproduction. The laboratory-adapted N2 (Bristol) strain and three wild strains were exposed to copper oxide nanoparticles or soluble copper (CuSO<sub>4</sub>). The p-values were determined by Tukey's HSD using R;  $p < 0.05$  was considered significant.

| Strain | Metal | N2    | CB4855 |       | DL238 |       | JU258  |        |
|--------|-------|-------|--------|-------|-------|-------|--------|--------|
|        |       | Cu    | NP     | Cu    | NP    | Cu    | NP     | Cu     |
| N2     | NP    | 0.999 | 0.002  | 1.000 | 0.081 | 0.999 | <0.001 | 0.440  |
|        | Cu    |       | 0.013  | 0.999 | 0.268 | 1.000 | <0.001 | 0.794  |
| CB4855 | NP    |       |        | 0.002 | 0.940 | 0.017 | 0.220  | 0.451  |
|        | Cu    |       |        |       | 0.073 | 0.998 | <0.001 | 0.413  |
| DL238  | NP    |       |        |       |       | 0.308 | 0.010  | 0.988  |
|        | Cu    |       |        |       |       |       | <0.001 | 0.830  |
| JU258  | NP    |       |        |       |       |       |        | <0.001 |

**Table I. Tukey's HSD statistical analysis results post 3-WAY ANOVA based on the interaction of strain and treatment (form of Cu) for reproduction.**

Statistical comparison, Tukey's HSD p-values, of the laboratory-adapted *Caenorhabditis elegans* N2 strain and the wild nematode strain for reproduction. The laboratory-adapted N2 (Bristol) strain and three wild strains were exposed to copper oxide nanoparticles or soluble copper (CuSO<sub>4</sub>). The p-values were determined by Tukey's HSD using R;  $p < 0.05$  was considered significant.

| Strain       | RJ907 (SMF1) | RJ938 (SMF2) |
|--------------|--------------|--------------|
| BY250        | <0.001       | 0.399        |
| RJ907 (SMF1) |              | <0.001       |

**Table J. Tukey’s HSD statistical analysis results post 3-WAY ANOVA based on the main factor of strain for neuron degeneration.**

Statistical comparison, Tukey’s HSD p-values, of the laboratory-adapted *Caenorhabditis elegans* N2 strain and the wild nematode strain for neuron degeneration. The laboratory-adapted N2 (Bristol) strain and three wild strains were exposed to copper oxide nanoparticles or soluble copper (CuSO<sub>4</sub>). The p-values were determined by Tukey’s HSD using R;  $p < 0.05$  was considered significant.

| Strain               | Metal | BY250 | RJ907 (SMF1) |        | RJ938 (SMF2) |        |
|----------------------|-------|-------|--------------|--------|--------------|--------|
|                      |       | Cu    | NP           | Cu     | NP           | Cu     |
| BY250                | NP    | 0.460 | <0.001       | <0.001 | 0.203        | 0.760  |
|                      | Cu    |       | 0.002        | <0.001 | 0.996        | 0.997  |
| SMF1<br>RJ907 (SMF1) | NP    |       |              | 0.990  | 0.008        | <0.001 |
|                      | Cu    |       |              |        | 0.001        | <0.001 |
| RJ938 (SMF2)         | NP    |       |              |        |              | 0.920  |

**Table K. Tukey’s HSD statistical analysis results post 3-WAY ANOVA based on the interaction of strain and treatment (form of Cu) for neuron degeneration.**

Statistical comparison, Tukey’s HSD p-values, of the laboratory-adapted *Caenorhabditis elegans* N2 strain and the wild nematode strain for neuron degeneration. The laboratory-adapted N2 (Bristol) strain and three wild strains were exposed to copper oxide nanoparticles or soluble copper (CuSO<sub>4</sub>). The p-values were determined by Tukey’s HSD using R;  $p < 0.05$  was considered significant.
